# Supplementary material for: Co2+/Co0 redox couple revealed by EPR spectroscopy triggers preferential coordination of reactants during SCR of NOx with propene over cobalt-exchanged zeolites
Source: Royal Society of Chemistry journal article supplement (doi:10.1039/b703088f), 2007-01-01
Supplement: b703088f.pdf [file b703088f.pdf]

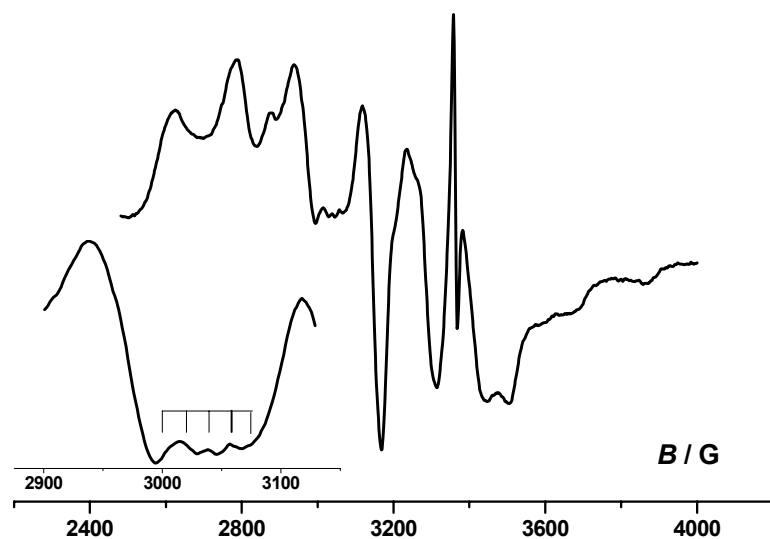

**Fig. 1** EPR spectrum (X-band, 77 K) of CoZSM-5 zeolite after adsorption of 2 Torr of NO. In the inset a part of the spectrum with resolved superhyperfine structure due to the two equivalent  $^{14}\text{N}$  nuclei of a dinitrosyl complex.

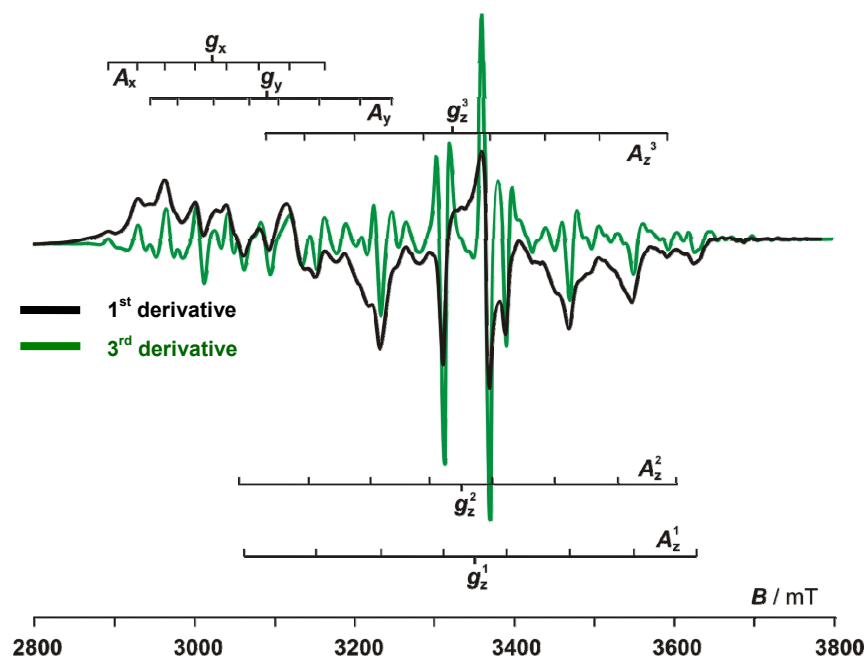

**Fig. 2** EPR spectrum (X-band, 77 K) of CoZSM-5 zeolite after adsorption of 8 Torr of CO along with its 3<sup>rd</sup> derivative indicating the presence of three different components contributing to the spectrum. The components are clearly visible in form of a stick-diagram of the  $z$  direction.

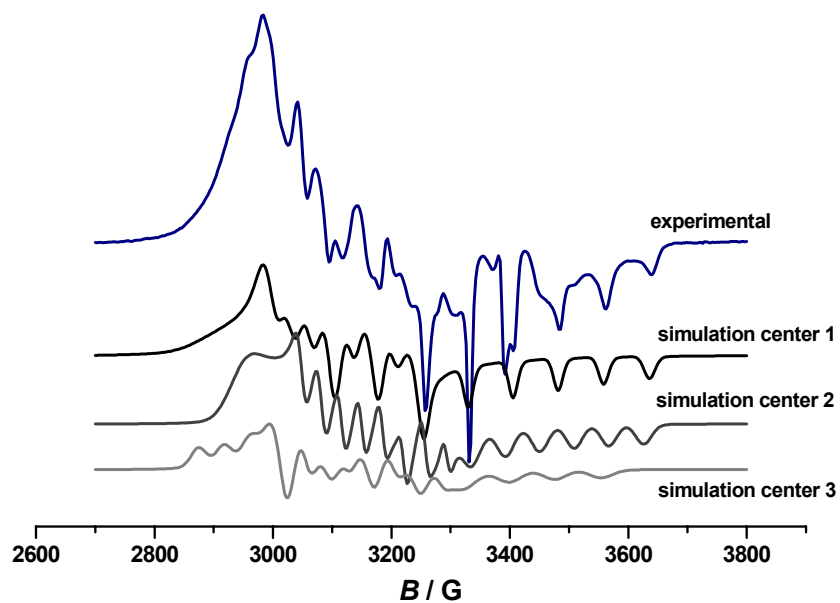

**Fig. 3** EPR spectrum (X-band, 77 K) of CoBEA zeolite after adsorption of 10 Torr of CO. Simulated spectrum was decomposed into three signals corresponding to three closely related carbonyl complexes.
